# Supplementary material
Source: PubMed Central journal article supplement (PMC3914620)
Supplement: 7e4b5d23185c7b8813b49ae681d50e59_genetics.113.157685-3.pdf [file 7e4b5d23185c7b8813b49ae681d50e59_genetics.113.157685-3.pdf]

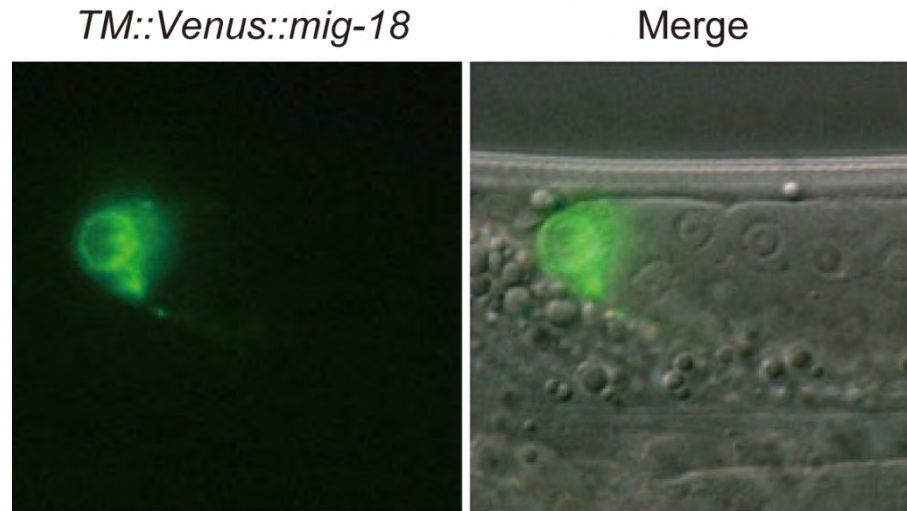

**Figure S4** Expression of *mig-24p::TM::Venus::mig-18*. Fluorescence (left) and merged fluorescence and Nomarski (right) images of a DTC in a young-adult hermaphrodite expressing *mig-24p::TM::Venus::mig-18* is shown.
