# Supplementary material
Source: PubMed Central journal article supplement (PMC3914620)
Supplement: 58752e9c136a0ab910536567dc11845b_genetics.113.157685-4.pdf [file 58752e9c136a0ab910536567dc11845b_genetics.113.157685-4.pdf]

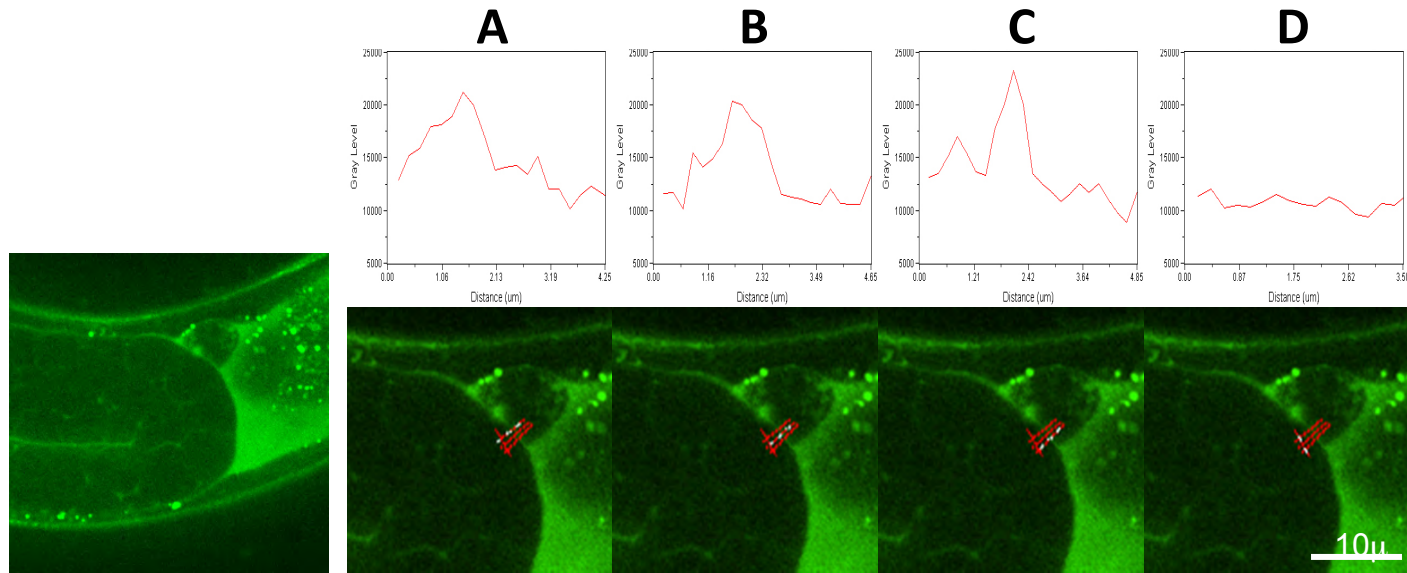

**Figure S1** Quantitative analysis of FBL-1C-Venus. Sample data for *fbl-1(tk45) Ex[fbl-1C::Venus]* are shown. For each sample, confocal images of the sagittal section of the gonads were obtained with a Zeiss Imager M2 microscope equipped with a spinning-disk confocal scan head (CSU-X1; Yokogawa) and an ImageEM CCD camera (ImageEM; Hamamatsu Photonics). Using ImageJ software, fluorescence intensities along three drawn lines, each of which crossed the basement membrane (A to C), were measured; the average background intensities inside the gonad (D) were subtracted from the peak values, and the resulting corrected values were averaged.
