# Supplementary material
Source: PubMed Central journal article supplement (PMC3914620)
Supplement: ad57a89a8a63ade406f15afc9222419a_genetics.113.157685-2.pdf [file ad57a89a8a63ade406f15afc9222419a_genetics.113.157685-2.pdf]

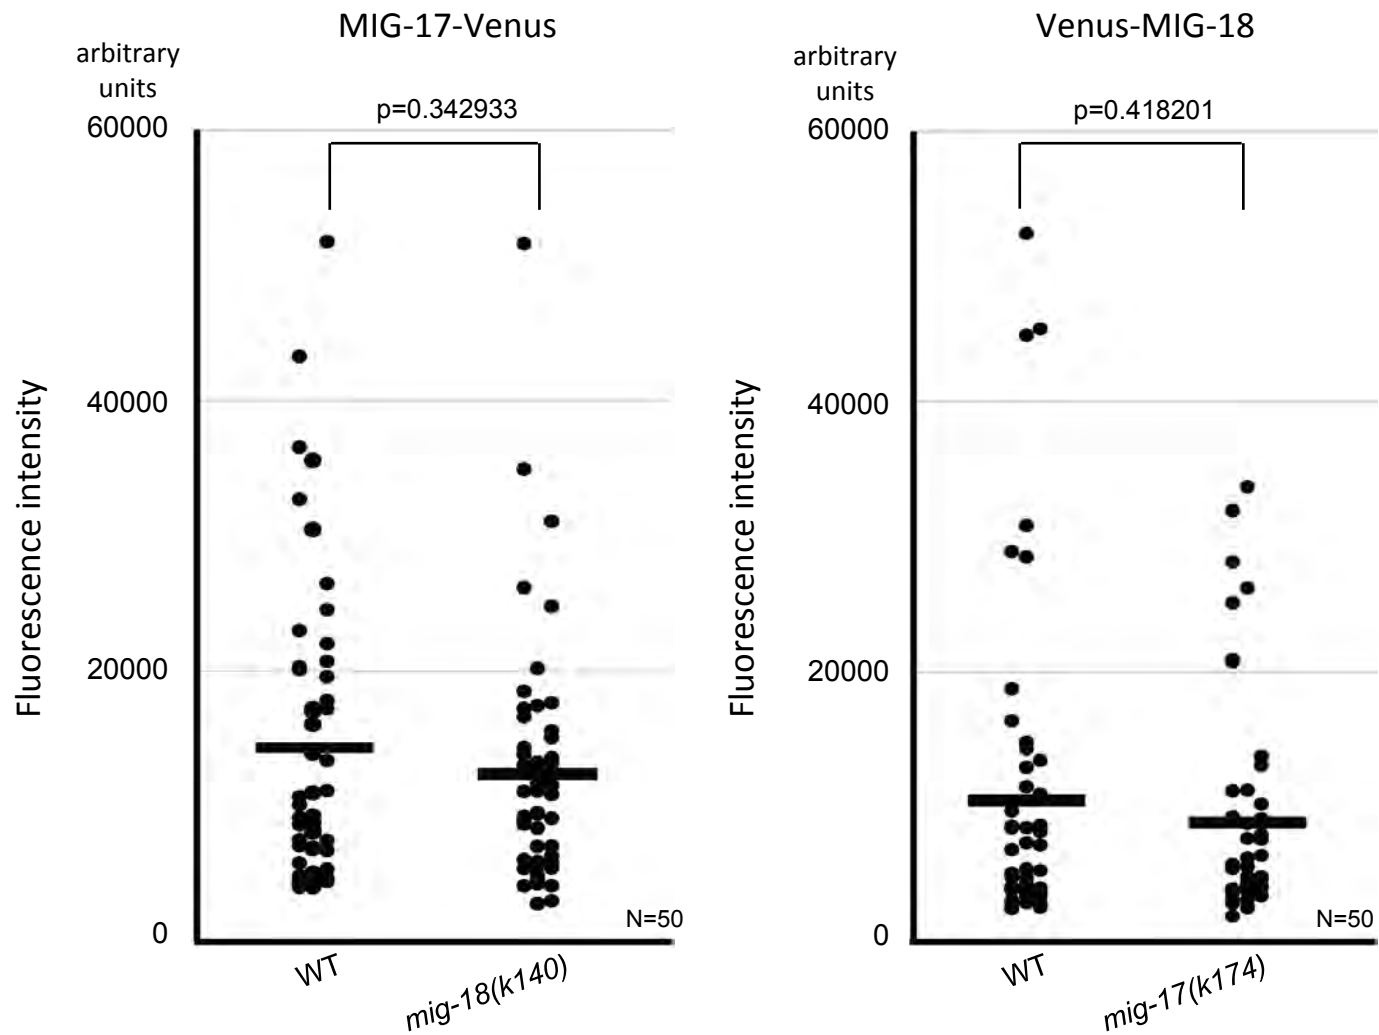

**Figure S2** Quantification of gonadal localization of MIG-17-Venus and Venus-MIG-18. The strains in Figure 3A and C were used. Fluorescence intensities of gonadal basement membrane were analyzed with similar procedures as described in Figure S1. The vertical scale is given in arbitrary units. Each dot represents the fluorescence intensity of a single animal. The horizontal bars represent mean values. *P*-values for Fisher's exact test against WT are indicated.
