# Supplementary material
Source: PubMed Central journal article supplement (PMC3914620)
Supplement: c376e6bffd1bc3c1cffb39e90e9da1c3_genetics.113.157685-5.pdf [file c376e6bffd1bc3c1cffb39e90e9da1c3_genetics.113.157685-5.pdf]

WT Ex[*mig-18p::SP::Venus::mig-18*]

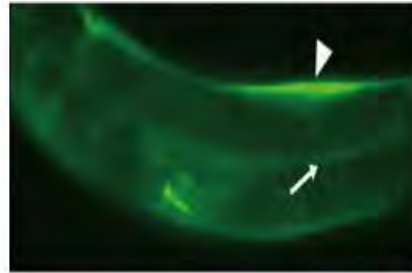

WT Ex[*mig-18p::ΔSP::Venus::mig-18*]

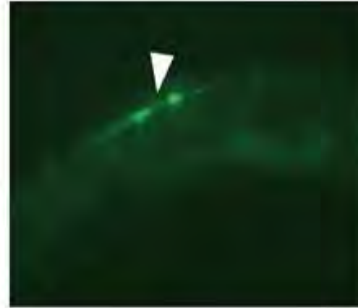

**Figure S3** Expression of *mig-18p::ΔSP::Venus::mig-18*. A wild-type animal expressing *mig-18p::Venus::mig-18* (upper) exhibited fluorescent signals in both the body wall muscles (arrowhead) and the surface of the gonad (arrow). The wild-type animal expressing *mig-18p::ΔSP::Venus::mig-18* (lower) exhibited signals only in the body wall muscles (arrowhead).
